## **Correction: Perlecan/HSPG2 and matrilysin/MMP-7 as indices of tissue invasion: tissue localization and circulating perlecan fragments in a cohort of 288 radical prostatectomy patients**

**Brian Grindel, Quanlin Li, Rebecca Arnold, John Petros, Majd Zayzafoon, Mark Muldoon, James Stave, Leland W.K. Chung, Mary C. Farach-Carson**

Present section: Due to an error made during submission of the revised files, acknowledgements were omitted from this manuscript.

Correct section: Corrected acknowledgements information is provided below. Authors sincerely apologize for this oversight.

Original article: Oncotarget. 2016; 7(9):10433-47. doi: 10.18632/oncotarget.7197.

### **ACKNOWLEDGMENTS**

This team project was supported by the National Institutes of Health/National Cancer Institute grant P01 CA098912. We are indebted to the many members of our team who contributed to the work including especially Drs. Ann-Christine Olsen, Dror Berel, Billie E. Smith, Arek Arkadiusz, Beatrice Knudsen, Dan Harrington and Andre Rogatko. We thank all of the members of the laboratories of the PO1 for many helpful discussions as this work progressed.
